# Supplementary material for: Piscine orthoreovirus (PRV) infects Atlantic salmon erythrocytes
Source: Springer Nature journal article supplement (doi:10.1186/1297-9716-45-35), 2014-01-01

**A**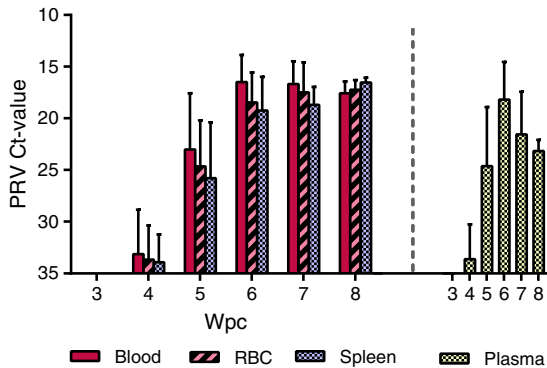**B**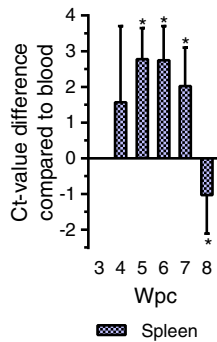**C**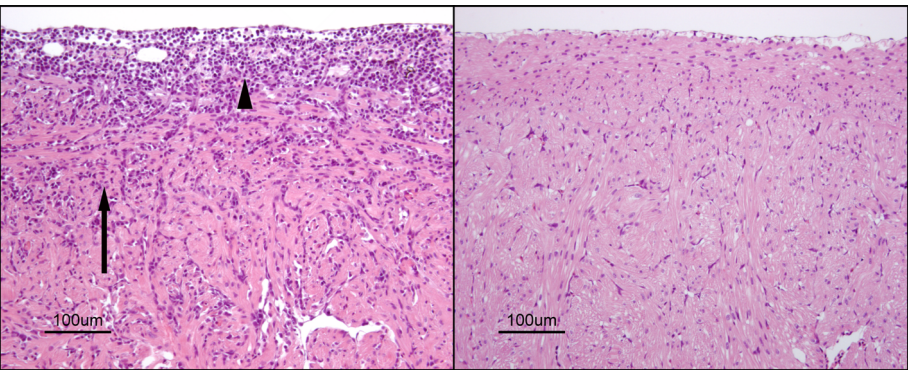

Supplement: 13567_2013_355_MOESM5_ESM.pdf [file 13567_2013_355_MOESM5_ESM.pdf]
