# Supplementary material for: Piscine orthoreovirus (PRV) infects Atlantic salmon erythrocytes
Source: Vet Res. 2014 Apr 3;45(1):35. doi: 10.1186/1297-9716-45-35 (PMC4234517; doi:10.1186/1297-9716-45-35)
Supplement: Additional file 2 — RT-qPCR Ct-values of PRV from Challenge Experiment # 2. RTq-PCR Ct-values of PRV in blood, RBC, spleen and plasma from Challenge Experiment # 2 sampled at 0 and 3–8 weeks post challenge (wpc). Unique identifiers for the individual fish sampled are included (Ex. F01-F06). The mean Ct-value and standard deviation (Mean (± SD)) for the different material are shown in the right-hand column. Samples with no Ct-value were assigned the value 35.0 when used in calculation of the mean. [file 1297-9716-45-35-S2.xlsx]

## Sheet: Info
Exp.infection		V3007
GENERAL INFO
Challenge model		HSMI
Location		VESO Vikan
Salinity		Saltwater
Duration		8 weeks
Inoculum		Blood pellet
Group		Cohabitants

## Sheet: Challenge #2 Ct-vaules
Additional file 2
Wpc		PRV Ct-values							Mean (± SD)
		F01	F02	F03	F04	F05	F06
0	Blood	No Ct	No Ct	No Ct	No Ct	No Ct	No Ct		35.0 (± 0.0)
	RBC	No Ct	No Ct	No Ct	No Ct	No Ct	No Ct		35.0 (± 0.0)
	Spleen	No Ct	No Ct	No Ct	No Ct	No Ct	No Ct		35.0 (± 0.0)
	Plasma	No Ct	No Ct	No Ct	No Ct	No Ct	No Ct		35.0 (± 0.0)
		F31	F32	F33	F34	F35	F36
3	Blood	No Ct	No Ct	No Ct	No Ct	No Ct	No Ct		35.0 (± 0.0)
	RBC	No Ct	No Ct	No Ct	No Ct	No Ct	No Ct		35.0 (± 0.0)
	Spleen	No Ct	No Ct	No Ct	No Ct	No Ct	No Ct		35.0 (± 0.0)
	Plasma	No Ct	No Ct	No Ct	No Ct	No Ct	No Ct		35.0 (± 0.0)
		F41	F42	F43	F44	F45	F46
4	Blood	No Ct	No Ct	No Ct	34.5	34.8	24.4		33.1 (± 4.3)
	RBC	No Ct	No Ct	No Ct	No Ct	No Ct	26.9		33.7 (± 3.3)
	Spleen	No Ct	No Ct	No Ct	No Ct	No Ct	28.4		33.9 (± 2.7)
	Plasma	No Ct	No Ct	No Ct	No Ct	No Ct	26.7		33.6 (± 3.4)
		F51	F52	F53	F54	F55	F56
5	Blood	30.2	21.6	27.0	25.2	16.9	16.9		23.0 (± 5.4)
	RBC	28.2	25.1	29.1	27.1	19.0	19.3		24.6 (± 4.4)
	Spleen	32.9	26.4	29.3	27.1	19.6	19.3		25.8 (± 5.4)
	Plasma	37.3	23.5	28.5	25.8	18.5	17.9		25.2 (± 7.2)
		F61	F62	F63	F64	F65	F66
6	Blood	14.9	21.6	14.4	15.8	15.5	16.7		16.5 (± 2.6)
	RBC	17.8	23.9	16.8	16.1	16.8	19.5		18.5 (± 2.9)
	Spleen	18.0	25.8	17.7	18.0	17.0	19.0		19.2 (± 3.3)
	Plasma	17.9	25.2	16.1	15.8	15.5	18.6		18.2 (± 3.6)
		F71	F72	F73	F74	F75	F76
7	Blood	17.7	14.7	16.1	20.3	14.2	17.1		16.7 (± 2.2)
	RBC	16.8	15.5	15.9	23.2	17.5	16.0		17.5 (± 2.9)
	Spleen	18.9	17.9	17.9	22.2	17.6	17.8		18.7 (± 1.7)
	Plasma	24.4	23.5	22.6	22.2	13.3	23.3		21.5 (± 4.1)
		F81	F82	F83	F84	F85	F86
8	Blood	16.4	17.2	16.8	19.4	18.3	17.2		17.6 (± 1.1)
	RBC	15.7	15.5	16.5	18.1	17.9	17.8		17.2 (± 0.9)
	Spleen	15.8	16.8	16.7	16.9	16.1	17.0		16.5 (± 0.5)
	Plasma	22.4	22.8	21.6	24.2	24.4	23.6		23.2 (± 1.1)
